# Supplementary material for: Imipramine impedes glioma progression by inhibiting YAP as a Hippo pathway independent manner and synergizes with temozolomide
Source: PubMed Central journal article supplement (PMC8500960; doi:10.1111/jcmm.16874), 2021-09-01

Figure S3

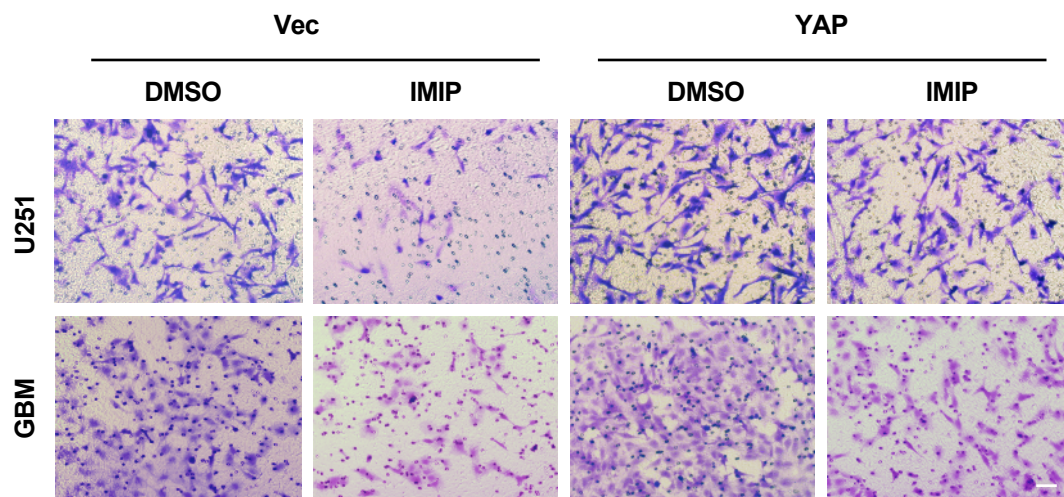

Supplement: JCMM-25-9350-s001.pdf [file JCMM-25-9350-s001.pdf]
